# Supplementary material
Source: PubMed Central journal article supplement (PMC3100908)
Supplement: supp_110.037630_Figure_S1_CO_Binding.pdf [file supp_110.037630_Figure_S1_CO_Binding.pdf]

Title: Substituted Imidazole of 5-Fluoro-2-[4-[(2-phenyl-1H-imidazol-5-yl)methyl]-1-piperazinyl]pyrimidine  
Inactivates Cytochrome P450 2D6 by Protein Adduction  
Authors: Nagy, Mocny, Diffenderfer, Hsi, Butler, Arthur, Fletke, Palamanda, Nomeir, Furge  
Journal: Drug Metabolism and Disposition

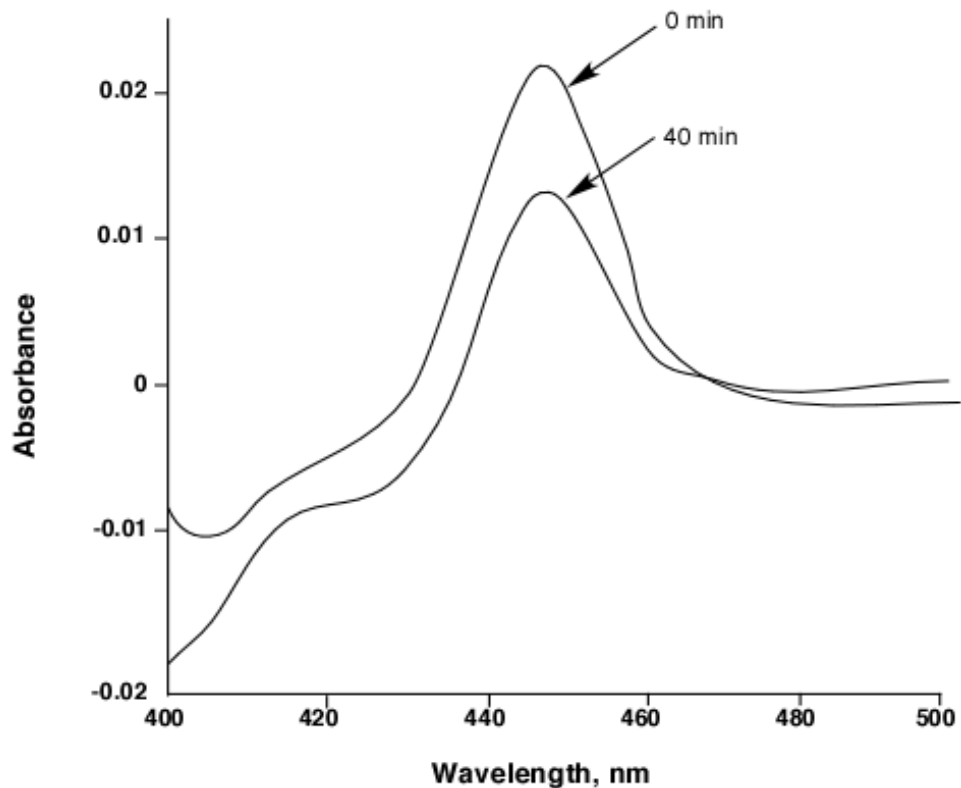

**Figure S1.** Spectrum of SCH 66712 affect on CO binding by CYP2D6 after 40 min incubation. (A) Purified and reconstituted CYP2D6 binding of CO at time 0 min. (B) The ability of purified and reconstituted CYP2D6 to bind CO in the presence of SCH 66712 and NADPH was reduced by ~25% after 40 min of inactivation.
