# Supplementary material
Source: PubMed Central journal article supplement (PMC3100908)
Supplement: supp_110.037630_Figure_S2_Hemechrome_Graph.pdf [file supp_110.037630_Figure_S2_Hemechrome_Graph.pdf]

Title: Substituted Imidazole of 5-Fluoro-2-[4-[(2-phenyl-1H-imidazol-5-yl)methyl]-1-piperazinyl]pyrimidine Inactivates Cytochrome P450 2D6 by Protein Adduction

Authors: Nagy, Mocny, Diffenderfer, Hsi, Butler, Arthur, Fletke, Palamanda, Nomeir, Furge

Journal: Drug Metabolism and Disposition

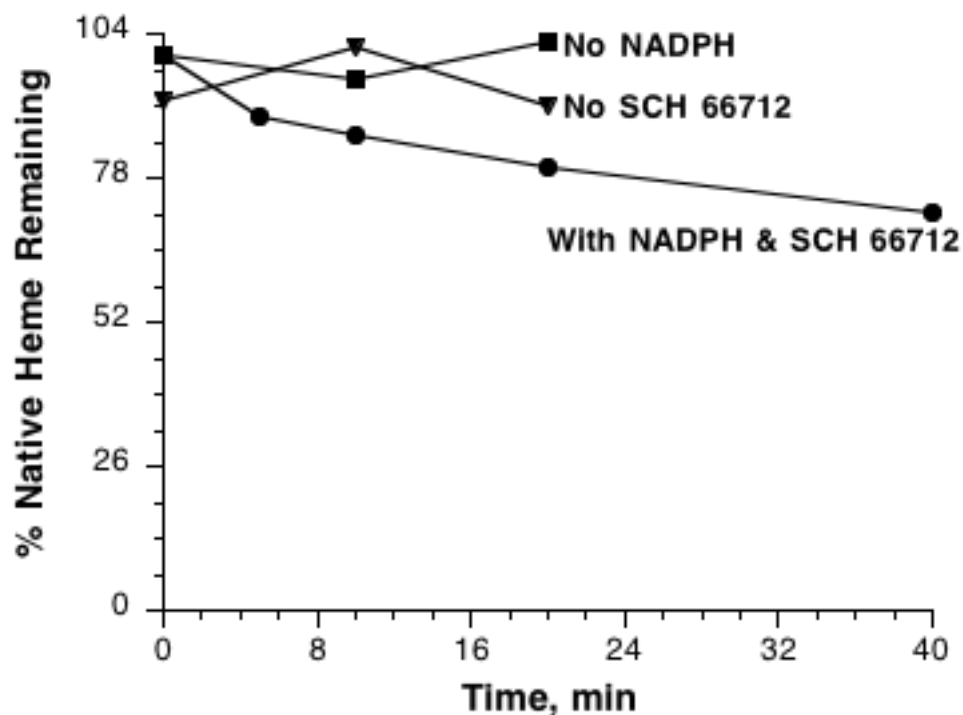

**Figure S2.** Native heme content determined by pyridine hemochrome assay. Native heme content was determined in purified, recombinant CYP2D6 samples incubated with or without Schering 66712 and with or without NADPH by measuring  $\Delta A_{557-575}$  and using the relationship:  $[\text{heme}] = \Delta A_{557-575} / [(0.0324 \mu\text{M}^{-1}\text{cm}^{-1})(1\text{cm})] = \text{nmols heme/mL}$ .
