# Supplementary material
Source: PubMed Central journal article supplement (PMC3100908)
Supplement: supp_110.037630_Figure_S3_KCNFINALFigure.pdf [file supp_110.037630_Figure_S3_KCNFINALFigure.pdf]

Title: Substituted Imidazole of 5-Fluoro-2-[4-[(2-phenyl-1H-imidazol-5-yl)methyl]-1-piperazinyl]pyrimidine  
Inactivates Cytochrome P450 2D6 by Protein Adduction  
Authors: Nagy, Mocny, Diffenderfer, Hsi, Butler, Arthur, Fletke, Palamanda, Nomeir, Furge  
Journal: Drug Metabolism and Disposition

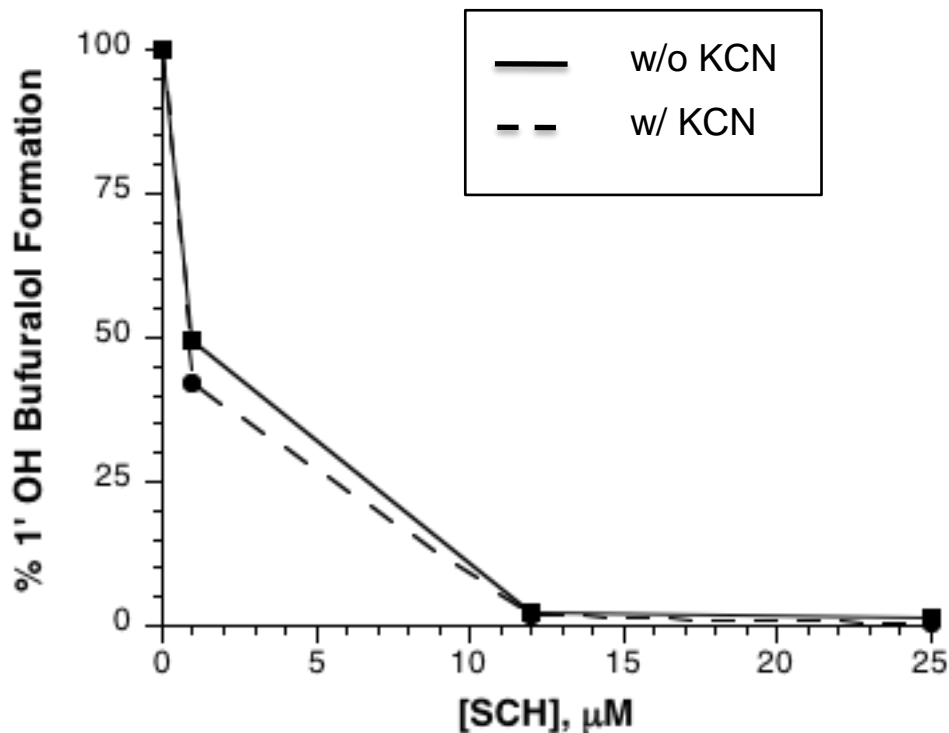

**Figure S3.** Analysis of possible imminium ion formation. Cyanide trapping assays were performed using primary reaction mixtures containing 0-25  $\mu\text{M}$  SCH 66712, 20 pmol CYP2D6 Supersomes and 2 mM potassium cyanide in 100 mM potassium phosphate, pH 7.4. Reactions were preincubated in a 37  $^{\circ}\text{C}$  shaking water bath and after three minutes were initiated by the addition of 1 mM NADPH. After 30 minutes, aliquots were removed and added to secondary reaction mixtures containing 100  $\mu\text{M}$  bufuralol and 1 mM NADPH in 100 mM potassium phosphate, pH 7.4, in a final volume of 200  $\mu\text{L}$ . Secondary reactions (in duplicate) were incubated for 10 minutes at 37  $^{\circ}\text{C}$  and quenched with 15  $\mu\text{L}$  70% perchloric acid. Reaction mixtures were centrifuged (2000  $\times$  g, 5 min) to remove the precipitated enzyme and aliquots of the recovered supernatants were directly injected onto HPLC for analysis.
