# Supplementary material
Source: PubMed Central journal article supplement (PMC3100908)
Supplement: supp_110.037630_Figure_S4_Revised_Whole_Supersomes.pdf [file supp_110.037630_Figure_S4_Revised_Whole_Supersomes.pdf]

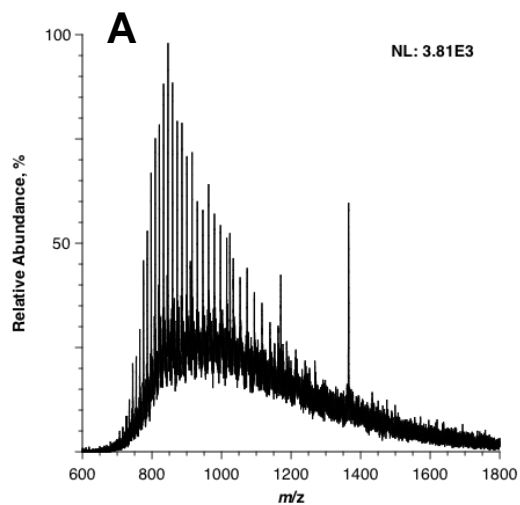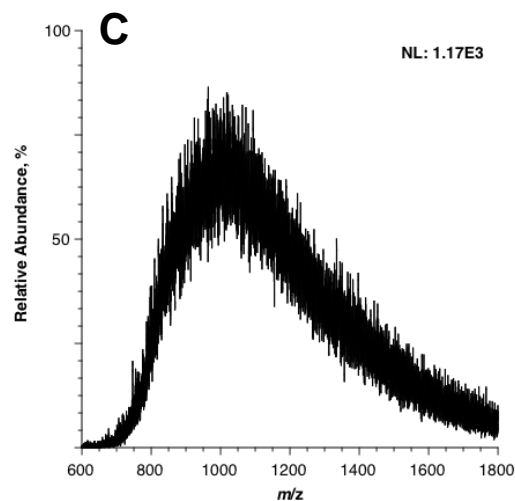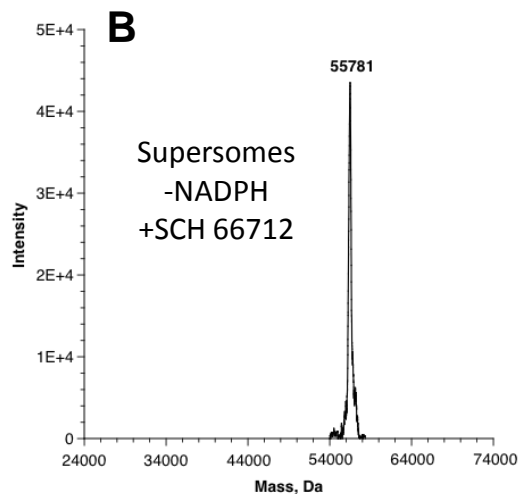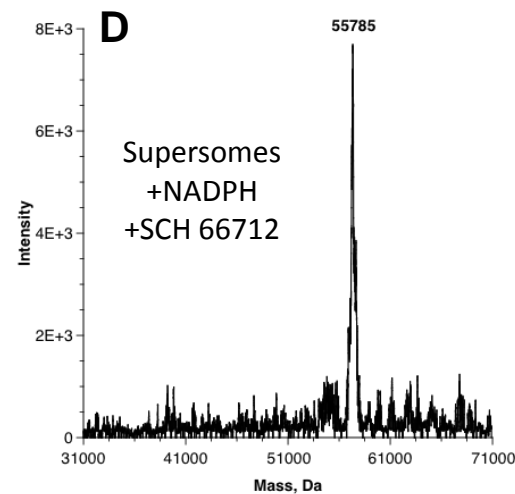

Title: Substituted Imidazole of 5-Fluoro-2-[4-[(2-phenyl-1H-imidazol-5-yl)methyl]-1-piperazinyl]pyrimidine  
 Inactivates Cytochrome P450 2D6 by Protein Adduction  
 Authors: Nagy, Mocny, Diffenderfer, Hsi, Butler, Arthur, Fletke, Palamanda, Nomeir, Furge  
 Journal: Drug Metabolism and Disposition

**Figure S4.** ESI-LC-MS analysis of CYP2D6. (A) ESI-MS of CYP2D6 from Supersomes following incubation with SCH 66712 in the absence of NADPH for 40 min at 30 °C. (B) Deconvolution of MS in Panel A shows CYP2D6 with parent mass of 55781 Da (C) ESI-MS of CYP2D6 from Supersomes following incubation with SCH 66712 in the presence of 10 mM NADPH for 40 min at 30 °C. (D) Deconvolution of MS in Panel C.
