# Supplementary material
Source: PubMed Central journal article supplement (PMC3100908)
Supplement: supp_110.037630_Figure_S6_Fragmentation_Patterns.pdf [file supp_110.037630_Figure_S6_Fragmentation_Patterns.pdf]

Title: Substituted Imidazole of 5-Fluoro-2-[4-[(2-phenyl-1H-imidazol-5-yl)methyl]-1-piperazinyl]pyrimidine Inactivates Cytochrome P450 2D6 by Protein Adduction  
 Authors: Nagy, Mocny, Diffenderfer, Hsi, Butler, Arthur, Fletke, Palamanda, Nomeir, Furge  
 Journal: Drug Metabolism and Disposition

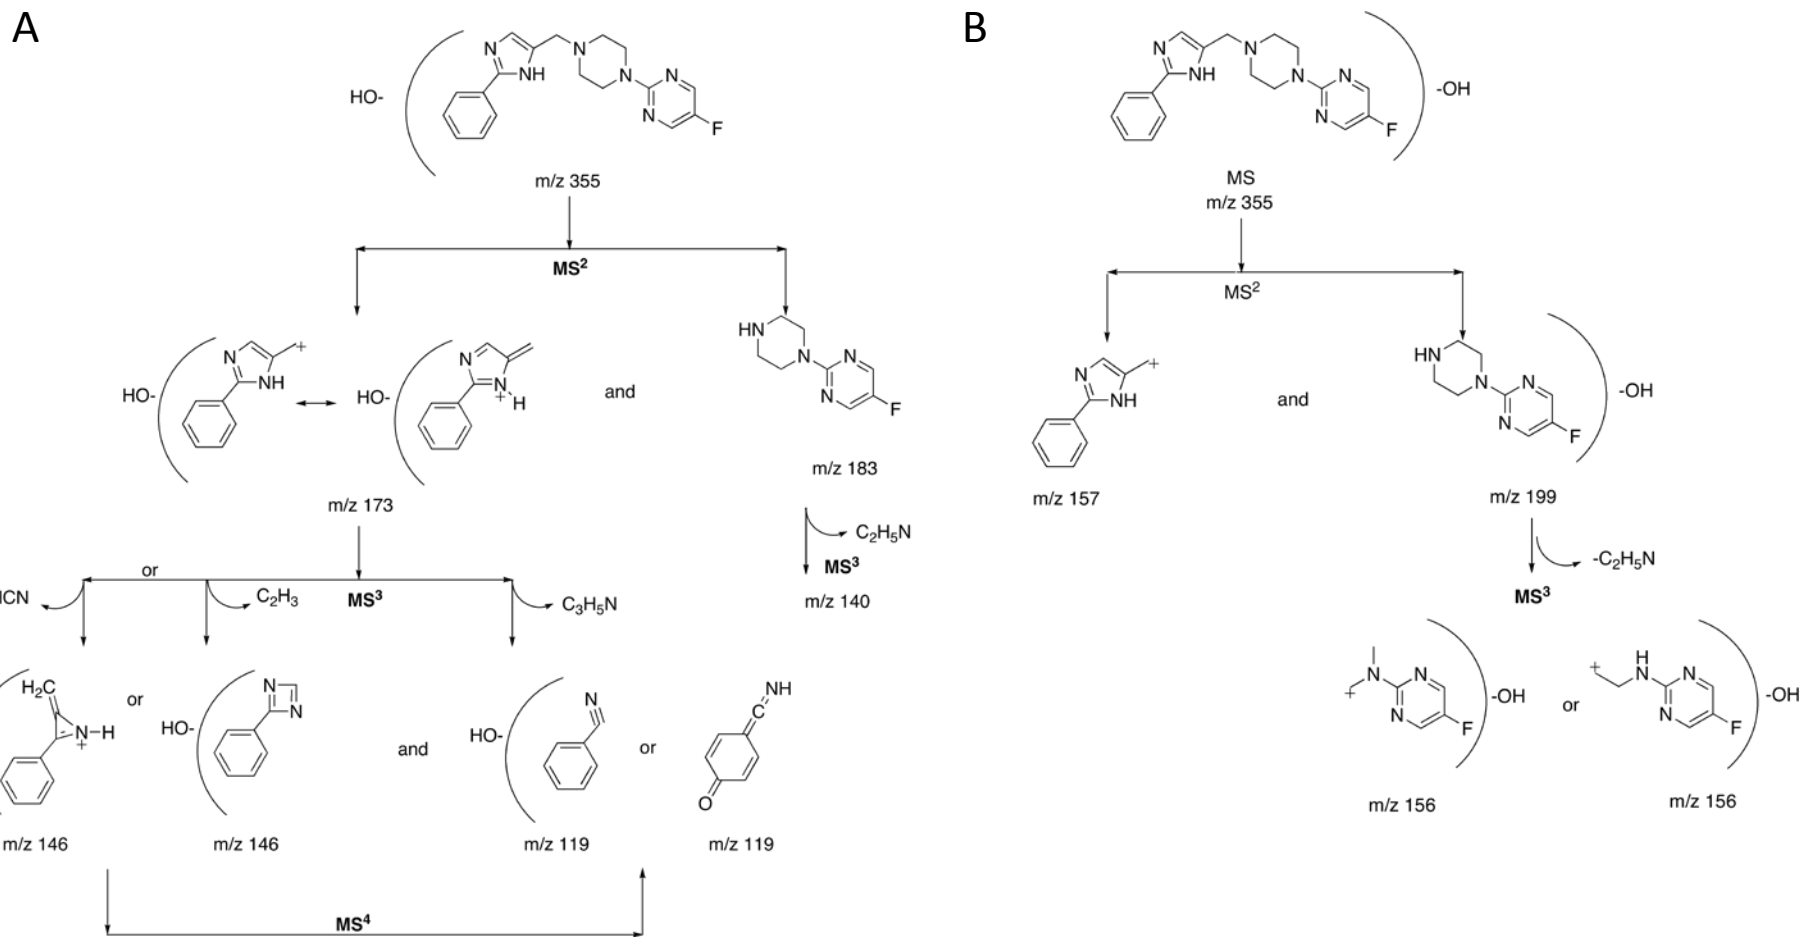

**Figure S6.** Explanation of MS fragmentation patterns for mono-oxygenated SCH 66712. (A) Possible MS fragmentation of SCH 66712 mono-oxygenated on the phenyl/imidazole side of the molecule. (B) Possible MS fragmentation of SCH 66712 mono-oxygenated on the piperazine/fluorinated aromatic side of the molecule. Note “-OH” indicates the presence of an oxygen and a hydrogen, but not necessarily as a hydroxyl group.
